# Supplementary material
Source: Royal Society of Chemistry journal article supplement (doi:10.1039/d6se00050a)
Supplement: d6se00050a1.pdf [file d6se00050a1.pdf]

## **Integrated Cell Engineering and Scale-Up of a Non-PGM Bifunctional Electrocatalyst for Durable AEM Water Electrolysis**

Kailash Singh <sup>a,b</sup>, Kavitha T<sup>a</sup>, and Kaliaperumal Selvaraj <sup>a,b,c,\*</sup>

<sup>a</sup> Nano and Computational Material Lab, Catalysis and Inorganic Chemistry Division,  
CSIR-National Chemical Laboratory, Pune 411008, India

<sup>b</sup> Academy of Scientific and Innovative Research (AcSIR), Ghaziabad, 201002, India

<sup>c</sup> Central Microscopy Facility, CSIR-National Chemical Laboratory, Pune 411008,  
India

\* Corresponding Author: [k.selvaraj.ncl@csir.res.in](mailto:k.selvaraj.ncl@csir.res.in), [kselva@gmail.com](mailto:kselva@gmail.com)

|                         |           |
|-------------------------|-----------|
| <b>Number of images</b> | <b>07</b> |
| <b>Number of tables</b> | <b>07</b> |
| <b>Number of pages</b>  | <b>18</b> |

Fig. S01. (a) Backscattered area of NCP-NS electrocatalyst, (b), (c), (d), (e) and (f) are elemental mapping of O, Ni, Cu, P and S elements.

Fig. S02. HRTEM analysis of the NCP-NS electrocatalyst, (a) HRTEM morphology image, (b) and (c) HRTEM with labeled d-spacing values.

Fig.S03. XPS characterization (a) High resolution spectra (survey scan) of NCP-NS electrocatalysts, (b) Ni (2p) (c) Cu (2p), (d) S (2p), and (e) P (2p).

Fig. S04. Nyquist plot for NCP-NS electrocatalyst at different temperature.

Fig. S05. Polarization curve of 13 cm<sup>2</sup> electrolyzer cell using benchmarked electrocatalyst pair (Pt/C || RuO<sub>2</sub>) at different temperature.

Fig.S06. SEM analysis of NCP-NS electrocatalyst (a) & (b) before and (c) & (d) after durability

Fig.S07. XRD pattern for NCP-NS electrocatalyst before and after the durability test.

Table S01. Mass loading effects on electrolyzer cell using Sym. NCP-NS electrocatalyst.

Table S02. Effect of applied torque on electrochemical performance.

Table S03. Gasket thicknesses effects on electrochemical performance.

Table S04. ICR measurements of the cell components for various gasket thickness (at 0.1A).

Table S05. Flow rate effects on electrochemical impedance and performance.

Table S06. Temperature effects on electrochemical performance.

Table S07. Various non-platinum group metal-based bifunctional electrocatalyst performance comparison

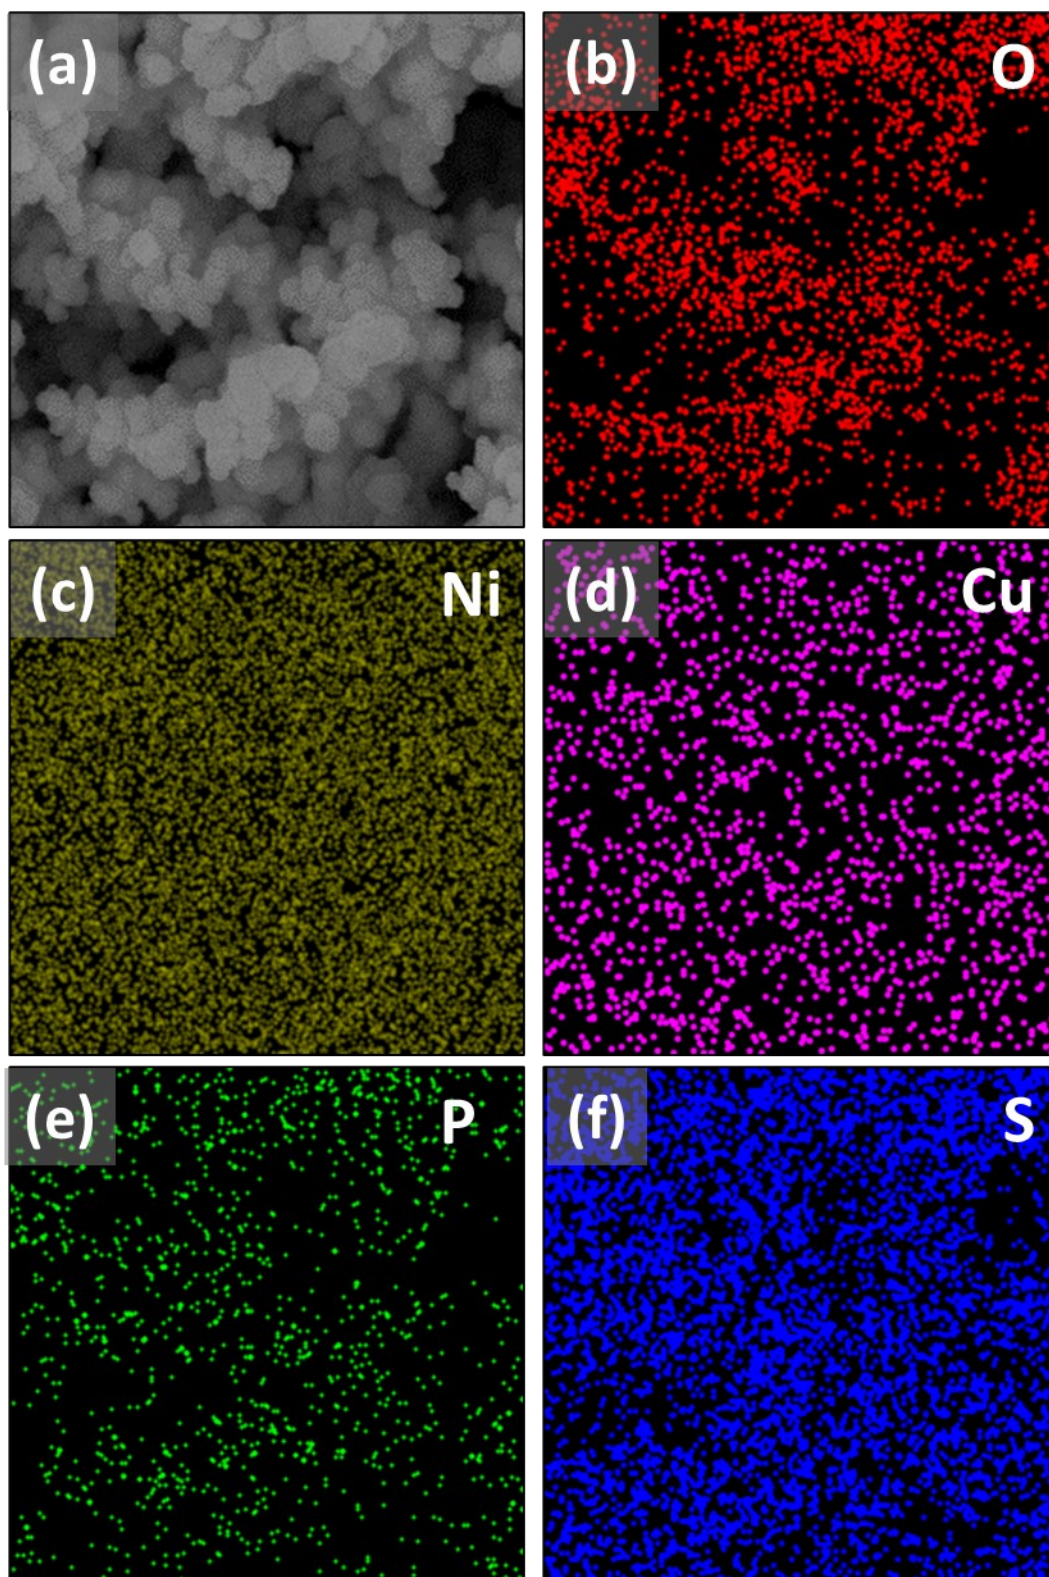

**Fig. S01.** (a) Backscattered area of NCP-NS electrocatalyst, (b), (c), (d), (e) and (f) are elemental mapping of O, Ni, Cu, P and S elements.

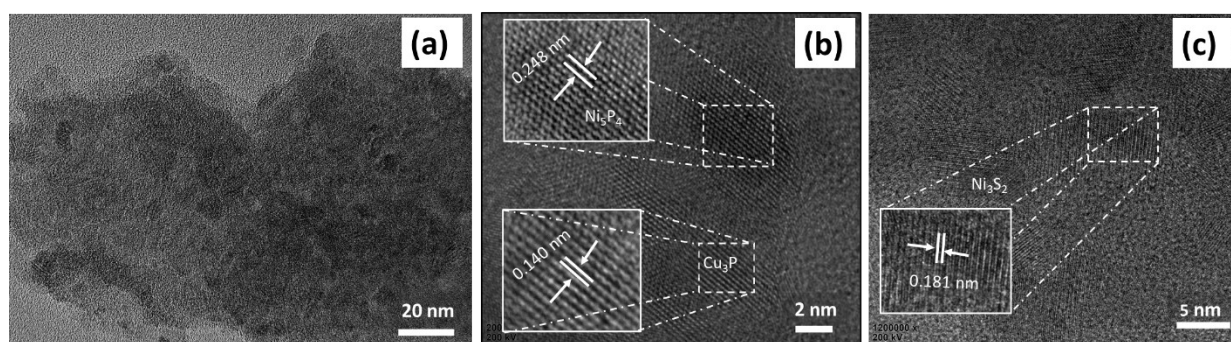

**Fig. S02.** HRTEM analysis of the NCP-NS electrocatalyst, (a) HRTEM morphology image, (b) and (c) HRTEM with labeled d-spacing values.

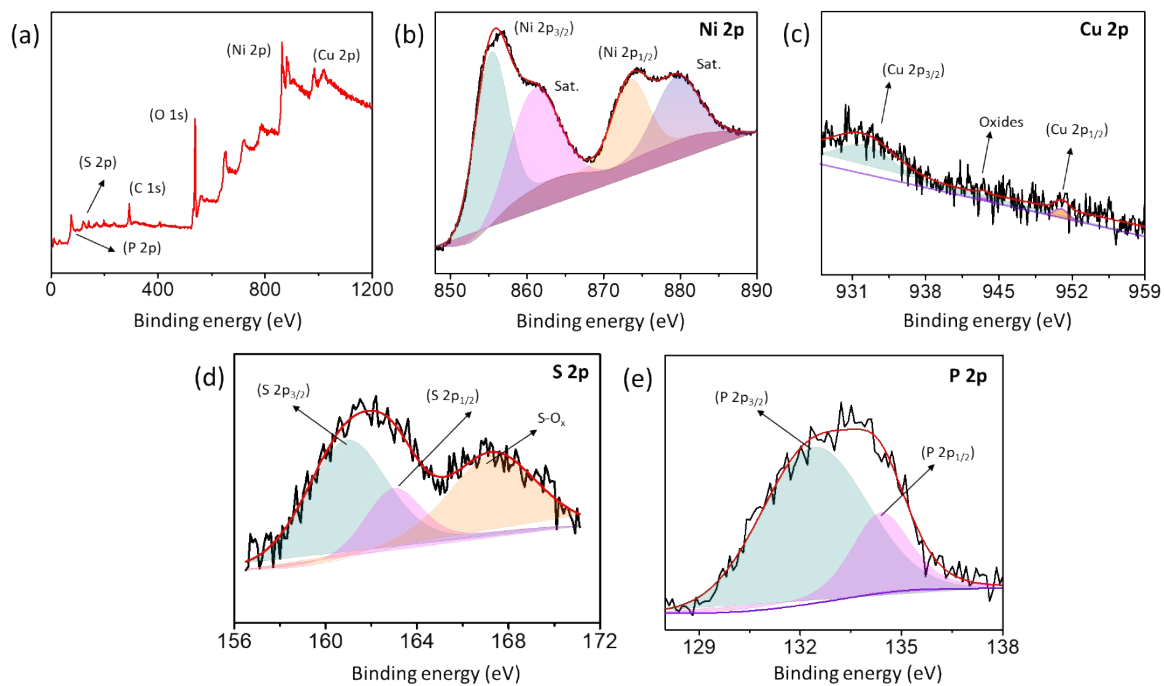

**Fig. S03.** XPS characterization, (a) High resolution spectra (survey scan) of NCP-NS electrocatalysts, (b) Ni (2p) (c) Cu (2p), (d) S (2p), (e) P (2p).

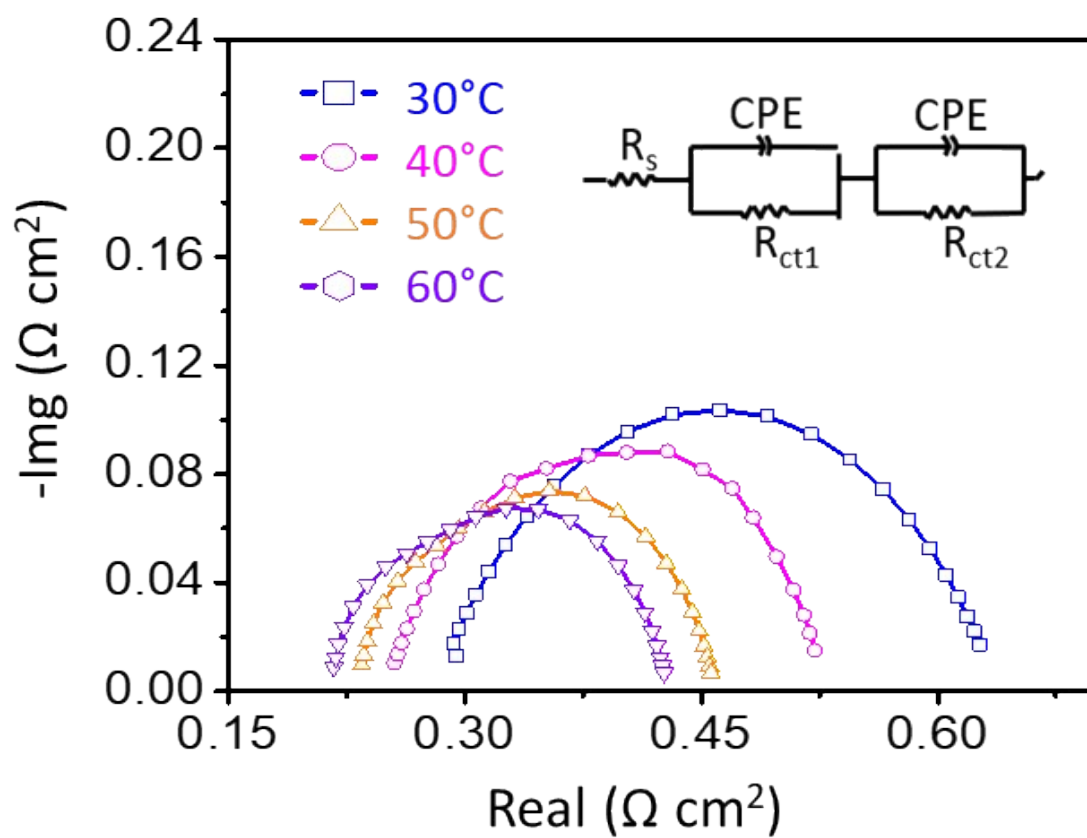

**Fig. S04.** Nyquist plot for NCP-NS electrocatalyst at different temperature.

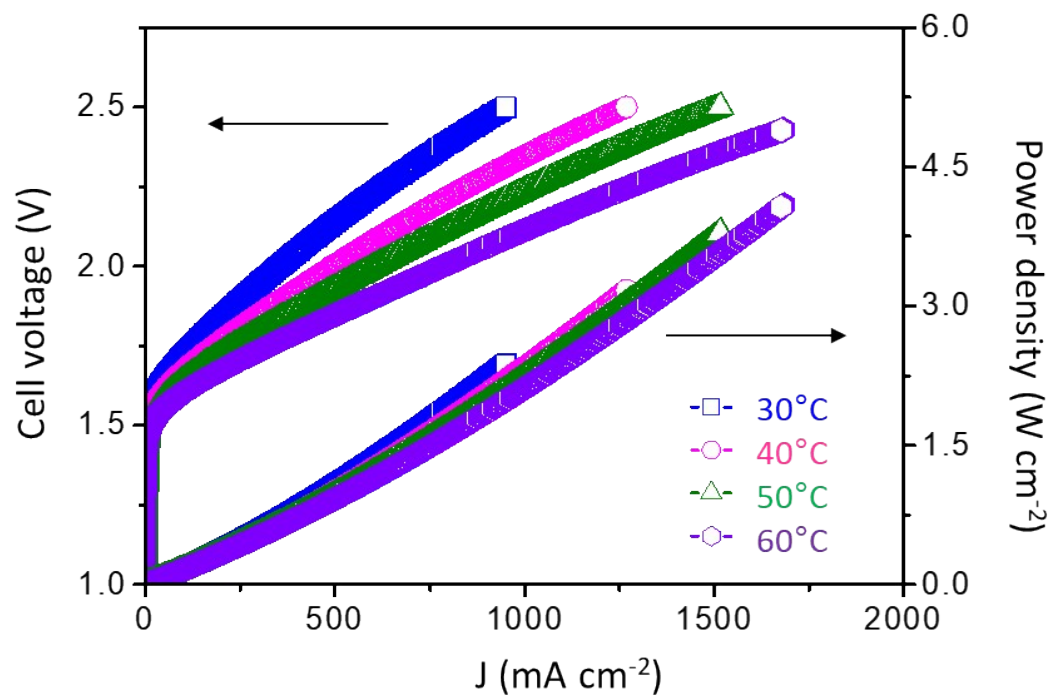

**Fig. S05.** Polarization curve of 13 cm<sup>2</sup> electrolyzer cell using benchmarked electrocatalyst pair (Pt/C || RuO<sub>2</sub>) at different temperature.

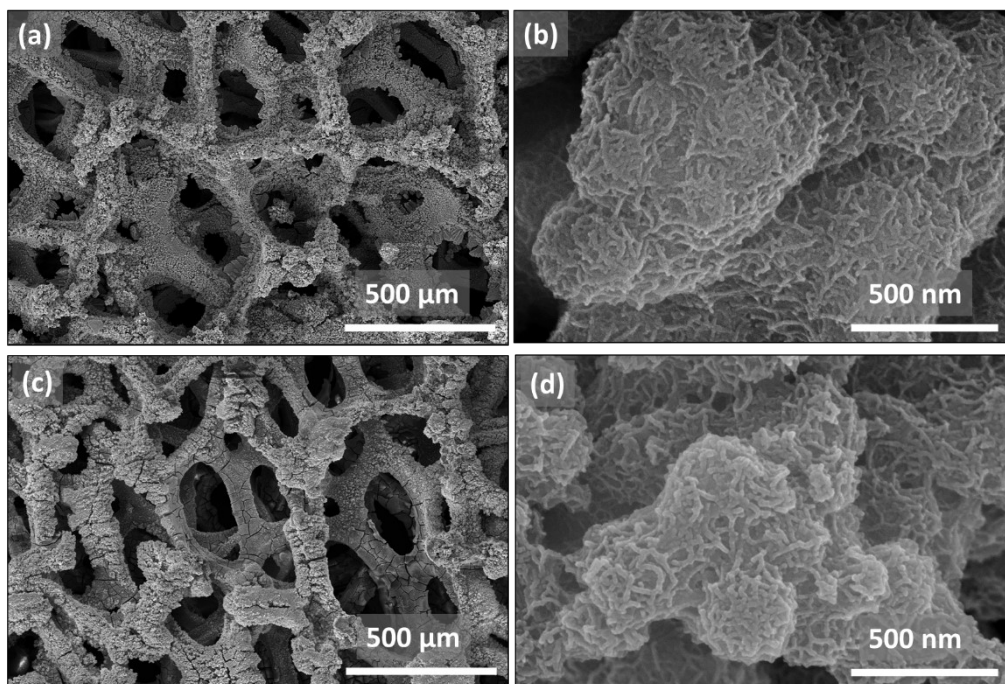

**Fig. S06.** FESEM images of NCP-NS electrocatalyst before and after the durability test: (a) and (b) Before durability, and (c) and (d) after durability.

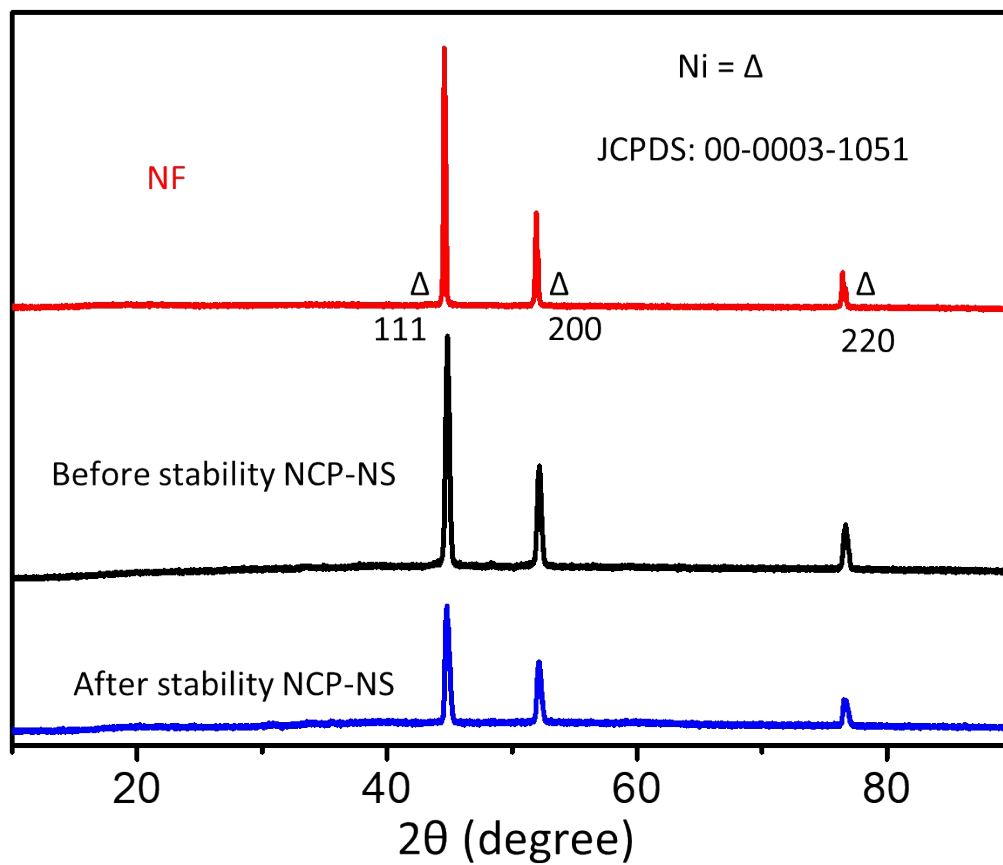

**Fig. S07.** XRD pattern for NCP-NS electrocatalyst before and after the durability test.

**Table S01.** Mass loading effects on electrolyzer cell using Sym. NCP-NS electrocatalyst.

| MLD<br>(mg cm <sup>-2</sup> ) | J <sub>2</sub><br>(mA cm <sup>-2</sup> ) | R <sub>s</sub><br>(mΩ cm <sup>2</sup> ) | Total R <sub>ct</sub><br>(mΩ cm <sup>2</sup> ) |
|-------------------------------|------------------------------------------|-----------------------------------------|------------------------------------------------|
| 03                            | 231                                      | 365                                     | 745                                            |
| 07                            | 344                                      | 350                                     | 420                                            |
| 10                            | 396                                      | 320                                     | 350                                            |
| 13                            | 408                                      | 310                                     | 335                                            |

**Table S02.** Effect of applied torque on electrochemical performance.

| Torque<br>(Nm) | $J_2$<br>(mA cm <sup>-2</sup> ) | $R_s$<br>(mΩ cm <sup>2</sup> ) | Total $R_{ct}$<br>(mΩ cm <sup>2</sup> ) |
|----------------|---------------------------------|--------------------------------|-----------------------------------------|
| 01             | 396                             | 293                            | 365                                     |
| 02             | 412                             | 290                            | 354                                     |
| 03             | 426                             | 291                            | 349                                     |
| 04             | 439                             | 289                            | 340                                     |

**Table S03.** Gasket thicknesses effects on electrochemical performance.

| Gasket thickness<br>( $\mu\text{m}$ ) | $J_2$<br>( $\text{mA cm}^{-2}$ ) | $R_s$<br>( $\text{m}\Omega \text{ cm}^{-2}$ ) | Total $R_{ct}$<br>( $\text{m}\Omega \text{ cm}^{-2}$ ) |
|---------------------------------------|----------------------------------|-----------------------------------------------|--------------------------------------------------------|
| 700                                   | 172                              | 804                                           | 720                                                    |
| 600                                   | 269                              | 503                                           | 470                                                    |
| 500                                   | 368                              | 317                                           | 352                                                    |
| 400                                   | 440                              | 312                                           | 350                                                    |
| 300                                   | 407                              | 307                                           | 410                                                    |

**Table S04.** ICR measurements of the cell components for various gasket thickness (at 0.1A).

| Gasket thickness<br>( $\mu\text{m}$ ) | Resistance ( $\text{m}\Omega$ ) |        |            |         |
|---------------------------------------|---------------------------------|--------|------------|---------|
|                                       | Endplate                        | Gasket | Electrodes | Overall |
| 700                                   | 0.28                            | 300    | 130        | 430     |
| 400                                   | 0.28                            | 4.92   | 0.5        | 5.70    |

**Table S05.** Flow rate effects on electrochemical impedance and performance

| Flow rate<br>(mL min <sup>-1</sup> cm <sup>-2</sup> ) | J <sub>2</sub><br>(mA cm <sup>-2</sup> ) | R <sub>s</sub><br>(mΩ cm <sup>2</sup> ) | Total R <sub>ct</sub><br>(mΩ cm <sup>2</sup> ) | Cell Temp.<br>(°C) |
|-------------------------------------------------------|------------------------------------------|-----------------------------------------|------------------------------------------------|--------------------|
| 0.50                                                  | 434                                      | 300                                     | 420                                            | 30 ± 2             |
| 1.00                                                  | 495                                      | 295                                     | 345                                            | 30 ± 2             |
| 1.50                                                  | 448                                      | 305                                     | 346                                            | 30 ± 2             |
| 2.00                                                  | 443                                      | 307                                     | 352                                            | 30 ± 2             |
| 2.50                                                  | 415                                      | 300                                     | 452                                            | 30 ± 2             |

**Table S06.** Temperature effects on electrochemical performance

| Temperature<br>(°C) | $J_2$<br>(mA cm <sup>-2</sup> ) | $R_s$<br>(mΩ cm <sup>2</sup> ) | Total $R_{ct}$<br>(mΩ cm <sup>2</sup> ) |
|---------------------|---------------------------------|--------------------------------|-----------------------------------------|
| 30                  | 496                             | 295                            | 335                                     |
| 40                  | 601                             | 250                            | 290                                     |
| 50                  | 807                             | 230                            | 200                                     |
| 60                  | 1010                            | 210                            | 180                                     |

**Table S07.** Various non-platinum group metal-based bifunctional electrocatalyst performance comparison

| Electrocatalysts                                                | Material synthesis temp. (°C) | MEA size (cm <sup>2</sup> ) | Electrolyzer Operating temp. (°C) | Activity J <sub>2</sub> (mA cm <sup>-2</sup> ) | Reference number |
|-----------------------------------------------------------------|-------------------------------|-----------------------------|-----------------------------------|------------------------------------------------|------------------|
| Co <sub>65</sub> Fe <sub>35</sub> O <sub>x</sub> H <sub>y</sub> | 30                            | 1                           | 50                                | 605                                            | 1                |
| LDHQDs/NiCoP                                                    | 400                           | 1                           | 80                                | 574                                            | 2                |
| NiCo(OH) <sub>2</sub>                                           | 140                           | 2                           | 30                                | ~170                                           | 3                |
| g-CN/NCF                                                        | 800                           | 5                           | 70                                | ~450                                           | 4                |
| SmNi <sub>0.02</sub> Fe-LDH                                     | 160                           | 5                           | 60                                | 900                                            | 5                |
| MoS <sub>2</sub> -Ni <sub>3</sub> S <sub>2</sub>                | 220                           | 4                           | 30                                | ~50                                            | 6                |
| NiFeS@Ti <sub>3</sub> C <sub>2</sub>                            | 160                           | 25                          | 50                                | 800                                            | 7                |
| NiFeLDH/Ni <sub>4</sub> Mo                                      | 30                            | 1                           | 30                                | 100@1.68                                       | 8                |
| FCPWP                                                           | 200                           | 25                          | 50                                | 425@1.85                                       | 9                |
| <b>NCP-NS</b>                                                   | <b>30</b>                     | <b>13</b>                   | <b>60</b>                         | <b>1012</b>                                    | <b>Our work</b>  |

### Energy efficiency calculation:<sup>10</sup>

Applied Current = 13.15 A (1012 mA cm<sup>-2</sup>) and corresponding voltage = 2.0 V

Power (W) = Current (A) × Cell voltage (V)

Power (W) = 13.15 A × 2 = 26.3 W (0.0263 kW)

Hydrogen production = 106 mL/min @ 60 °C (333.15 K) and 1 atm pressure.

Volume to mass conversion based on Ideal gas law: V = 27.32 L/mol @ 60 °C

However,  $n = \frac{0.106 \text{ L/min}}{27.32 \text{ L/mol}} = 0.0039 \text{ mol/min}$

Conversion into g/min: Molar mass of hydrogen = 2.016 g/mol

Hydrogen production (g/min) = 0.0039 mol/min × 2.016 g/mol = 0.0078 g/min

Hydrogen production (g/h) = 0.469

Hydrogen production (kg/h) = 0.00047

$$\text{Specific energy consumption (kWhkg}^{-1}\text{)} = \frac{\text{Power consumed (kW)}}{\text{Hydrogen production (kg/h)}}$$

$$\text{Specific energy consumption (kWhkg}^{-1}\text{)} = \frac{0.0263 \text{ (kW)}}{0.00047 \text{ (kg/h)}}$$

$$\text{Specific energy consumption (kWhkg}^{-1}\text{)} = 55.96 \text{ kWhkg}^{-1}$$

$$\text{Energy efficiency (kWhkg}^{-1}\text{)} = \frac{\text{Theoretical energy consumption based on HHV (39.4 kWh/kg)}}{\text{Experimental energy consumption (}\frac{\text{kWh}}{\text{kg}}\text{)}} \times 100$$

$$\text{Energy efficiency (kWhkg}^{-1}\text{)} = \frac{(39.4 \text{ kWhkg}^{-1})}{(55.96 \text{ kWhkg}^{-1})} \times 100$$

$$\text{Energy efficiency (kWhkg}^{-1}\text{)} = 70.41 \%$$

## References:

1. S. Hong, H. Kim, H. W. Jang, S. Y. Kim and S. H. Ahn, *Dalton Trans.*, 2023, **52**, 6324-6330.
2. L. Li, S. Liu, T. Yang, L. Zhou, K. Wang, E. Wang, X. Yu, K. C. Chou, R. Guo, Z. Ma and X Hou, *Inorg. Chem. Front.*, 2024, **11**, 4794-4801.
3. S. Ju, Y. Liu, M. Pei, Y. Shuai, Z. Zhai, W. Yan, Y. J. Wang and J. Zhang, *J. Colloid Interface Sci.*, 2024, **653**, 1704-1714.
4. G. Y. Jang, S. Y. Kang, H. J. Choi, G. Na, H. Choi, J. E. Park, O. H. Kim, Y. H. Cho and Y. E. Sung, *J. Electroanal. Chem.*, 2025, **987**, 119111.
5. S. Nagappan, H. Gurusamy, H. Minhas, A. Karmakar, S. Ravichandran, B. Pathak and S. Kundu, *Small*, 2025, **9**, 2401655.
6. Y. Kumar, S. Barik, N. S. Samudre, G. P. Kharabe, I. Chauhan, N. Manna, S. Bhat and S. Kurungot, *Adv. Sustain. Syst.*, 2025, **9**, 2400957.
7. D. Chanda, K. Kannan, J. Gautam, M. M. Meshesha, S. G. Jang, V. A. Dinh and B. L. Yang, *Appl. Catal., B*, 2023, **321**, 122039
8. F. Wu, F. Tian, M. Li, S. Geng, L. Qiu, L. He, L. Li, Z. Chen, Y. Yu, W. Yang and Y. Hou, *Angew. Chem., Int. Ed.*, 2025, **64**, e202413250.
9. R. Balu, G. Devendrapandi, L. Gnanasekaran, P. C. Karthika, O. H. Abd-Elkader, W. K. Kim, V. R. Minnam Reddy, M. Kapoor, S. Singh and M. Lavanya, *Int. J. Hydrogen Energy*, 2024, **90**, 1378-1389.
10. A. M. I. Noor Azam, T. Ragunathan, N. N. Zulkefli, M. S. Masdar, E. H. Majlan, R. M. Yunus, N. S. Shamsul, T. Husaini and S. N. A. Shaffee. *Polymers*, 2023, **15**, 1301.
